# Supplementary material for: Circulating tumor DNA strongly predicts efficacy of chemotherapy plus immune checkpoint inhibitors in patients with advanced gastro-esophageal adenocarcinoma
Source: Research Square preprint supplement (doi:10.21203/rs.3.rs-4739358/v1), 2024-09-18
Supplement: Supplementary file 1 [file 1191458340318befa390195d.docx]

**Supp Table 4. Patient and tumor characteristics according ctDNA at diagnosis (cut-off at 1.1 ng/ml)**

| Variable (n, %) | low, N = 561 | high, N = 141 | p-value2 |
| --- | --- | --- | --- |
| **Sex** |  |  | 0.050 |
| Female | 21 (38%) | 1 (7.1%) |  |
| Male | 35 (62%) | 13 (93%) |  |
| **Age** | 59 (53, 68) | 66 (51, 74) | 0.4 |
| **ECOG PS** |  |  | 1.0 |
| 0 | 19 (34%) | 5 (36%) |  |
| 1 | 37 (66%) | 9 (64%) |  |
| **Primary tumor site** |  |  | 0.8 |
| GEJ | 30 (54%) | 8 (57%) |  |
| Stomach | 26 (46%) | 6 (43%) |  |
| **Tumor subtype3** |  |  | 0.6 |
| Diffuse | 22 (39%) | 6 (43%) |  |
| Intestinal | 30 (54%) | 6 (43%) |  |
| Other | 4 (7.1%) | 2 (14%) |  |
| **Resection of primary tumor** | 17 (30%) | 3 (21%) | 0.7 |
| **Liver metastasis** | 20 (36%) | 8 (57%) | 0.14 |
| **LDH (times normal)** | 0.91 (0.74, 1.09) | 1.15 (0.94, 1.45) | 0.073 |
| Unknown | 5 | 1 |  |
| **PAL (times normal)** | 0.90 (0.69, 1.37) | 1.27 (0.98, 1.92) | 0.061 |
| Unknown | 1 | 0 |  |
| **NLR** | 0.19 (0.15, 0.26) | 0.20 (0.13, 0.23) | 0.8 |
| Unknown | 1 | 0 |  |
| **HER2 overexpression** | 14 (25%) | 3 (21%) | 1.0 |
| GEJ: gastro-esophageal junction; LDH: lactate dehydrogenase; ALP: alkaline phosphatase; NLR: neutrophil to lymphocyte ratio1n (%); Median (IQR) | | | |
| 2 Fisher's exact test; Wilcoxon rank sum test; Pearson's Chi-squared test | | | |

3 Lauren classification
