# Supplementary material for: Circulating tumor DNA strongly predicts efficacy of chemotherapy plus immune checkpoint inhibitors in patients with advanced gastro-esophageal adenocarcinoma
Source: Research Square preprint supplement (doi:10.21203/rs.3.rs-4739358/v1), 2024-09-18
Supplement: Supplementary file 2 [file 3987ca64bae24bbbd4c5cc93.docx]

**Supp Table 3. Association between ct/cfDNA level and survival.**

|  | | ***Progression Free Survival*** | | | ***Overall Survival*** | | | ***Time to strategy failure*** | | |
| --- | --- | --- | --- | --- | --- | --- | --- | --- | --- | --- |
| Group | Characteristic | HR1 | 95% CI1 | p-value | HR1 | 95% CI1 | p-value | HR1 | 95% CI1 | p-value |
| ***ctDNA and cfDNA as continous variables*** |  |  |  |  |  |  |  |  |  |  |
|  | ***ctDNA concentration at baseline*** | 1.05 | 0.99, 1.11 | 0.089 | 1.06 | 1.00, 1.12 | 0.046 | 1.04 | 0.98, 1.10 | 0.23 |
|  | ***cfDNA concentration at baseline*** | 1.04 | 1.01, 1.06 | 0.002 | 1.04 | 1.02, 1.07 | <0.001 | 1.03 | 1.01, 1.05 | 0.012 |
|  | ***∆ctDNA*** | 1.01 | 0.95, 1.07 | 0.74 | 1.05 | 0.98, 1.12 | 0.18 | 1.00 | 0.94, 1.07 | 0.91 |
|  | ***∆cfDNA*** | 1.05 | 0.85, 1.31 | 0.64 | 1.08 | 0.87, 1.33 | 0.49 | 1.06 | 0.86, 1.31 | 0.57 |
| ***ctDNA and cfDNA dichotomized by median*** |  |  |  |  |  |  |  |  |  |  |
|  | ***ctDNA concentration at baseline*** |  |  |  |  |  |  |  |  |  |
|  | Low ctDNA | — | — |  | — | — |  | — | — |  |
|  | High ctDNA | 1.69 | 0.98, 2.90 | 0.057 | 1.92 | 1.03, 3.61 | 0.041 | 1.96 | 1.13, 3.38 | 0.016 |
|  | ***cfDNA concentration at baseline*** |  |  |  |  |  |  |  |  |  |
|  | Low cfDNA | — | — |  | — | — |  | — | — |  |
|  | High cfDNA | 1.74 | 1.07, 2.83 | 0.026 | 2.05 | 1.19, 3.51 | 0.009 | 1.84 | 1.14, 2.97 | 0.013 |
|  | ***∆ctDNA*** |  |  |  |  |  |  |  |  |  |
|  | ctDNA decrease ≥ 75% | — | — |  | — | — |  | — | — |  |
|  | ctDNA decrease < 75% | 2.09 | 1.19, 3.67 | 0.008 | 2.51 | 1.35, 4.68 | 0.004 | 1.88 | 1.09, 3.25 | 0.023 |
|  | ***∆cfDNA*** |  |  |  |  |  |  |  |  |  |
|  | cfDNA decrease ≥ 9% | — | — |  | — | — |  | — | — |  |
|  | cfDNA decrease < 9% | 0.95 | 0.56, 1.63 | 0.86 | 1.23 | 0.69, 2.22 | 0.48 | 0.98 | 0.58, 1.66 | 0.95 |
| 1HR = Hazard Ratio, CI = Confidence Interval | | | | | | | | | | |
