# Supplementary material for: Circulating tumor DNA strongly predicts efficacy of chemotherapy plus immune checkpoint inhibitors in patients with advanced gastro-esophageal adenocarcinoma
Source: Research Square preprint supplement (doi:10.21203/rs.3.rs-4739358/v1), 2024-09-18
Supplement: Supplementary file 3 [file 45b1ec44a339254e806c0d5c.docx]

**Supp Table 5. Correlation between change in ctDNA concentration and PFS at 4 months**

|  | Change in ctDNA concentration | |  | |
| --- | --- | --- | --- | --- |
|  | ctDNA decrease >75% | ctDNA decrease ≤75% | Total | p-value1 |
| Patients alive and with no progression at 4 months |  |  |  | 0.006 |
| Yes | 19 (68%) | 9 (32%) | 28 (100%) |  |
| No | 8 (31%) | 18 (69%) | 26 (100%) |  |
| Total | 27 (50%) | 27 (50%) | 54 (100%) |  |
| 1Pearson's Chi-squared test | | | | |
