# Supplementary material for: Circulating tumor DNA strongly predicts efficacy of chemotherapy plus immune checkpoint inhibitors in patients with advanced gastro-esophageal adenocarcinoma
Source: Research Square preprint supplement (doi:10.21203/rs.3.rs-4739358/v1), 2024-09-18
Supplement: Supplementary file 4 [file 96a14af768887c975bbb6fc2.docx]

**Supp Table 1. Patient and tumor characteristics of overall trial population and patients with circulating DNA analyses**

| Variable (n, %) | Overall population,  N = 96 | Circulating DNA population, N = 70 |
| --- | --- | --- |
| **Sex** |  |  |
| Female | 68 (70.8%) | 48 (68.6%) |
| Male | 28 (29.2%) | 22 (31.4%) |
| **Age (mean, SD)** | 59.99 (12.52) | 59.82 (12.47) |
| **ECOG PS** |  |  |
| 0 | 32 (33.3%) | 24 (34.3%) |
| 1 | 64 (66.7%) | 46 (65.7%) |
| **Primary tumor site** |  |  |
| GEJ | 51 (53.1%) | 38 (54.3%) |
| Stomach | 45 (46.9%) | 32 (45.7%) |
| **Tumor subtype1** |  |  |
| Diffuse | 38 (39.6%) | 28 (40.0%) |
| Intestinal | 50 (52.1%) | 36 (51.4%) |
| Other | 6 (6.3%) | 6 (8.6%) |
| Unknown | 2 (2.1%) |  |
| **Resection of primary tumo**r | 25 (26.0%) | 20 (28.6%) |
| **Type of disease** |  |  |
| Locally advanced | 8 (8.3%) | 4 (5.7%) |
| Metastatic | 88 (91.7%) | 66 (94.3%) |
| **Liver metastasis**  **Lung metastasis**  **Peritoneal carcinomatosis**  **Lymph node metastasis** | 38 (39.6%)  19 (21.6%)  35 (39.8%)  38 (43.2%) | 28 (40.0%)  13 (19.7%)  22 (33.3%)  31 (47.0%) |
| **Time to metastatic disease** |  |  |
| Metachronous | 32 (33.3%) | 23 (32.9%) |
| Synchronous | 64 (66.7%) | 47 (67.1%) |
| **LDH (times normal)** | 1.14 (0.80) | 1.07 (0.62) |
| Unknown | 7 | 6 |
| **ALP (times normal)** | 1.28 (0.97) | 1.31 (1.02) |
| Unknown | 1 | 1 |
| **NLR ratio** | 0.33 (0.31, 0.36) | 0.19 (0.14, 0.23) |
| Unknown | 1 | 0 |
| **HER2 status**  Positive  Negative  Unknown | 25 (26.0%)  70 (72.9%)  1 (1.0%) | 17 (24.3%)  53 (75.7%)  0 |
| **MSI status** |  |  |
| dMMR | 4 (4.2%) | 3 (4.3%) |
| pMMR | 89 (92.7%) | 64 (91.4%) |
| Unknown | 3 (3.1%) | 3 (4.3%) |
| **CPS PD-L1** |  |  |
| CPS ≥5 | 19 (35.2%) | 17 (35.4%) |
| CPS <5 | 35 (64.8%) | 31 (64.6%) |
| Unknown | 5 | 5 |
| **TPS PD-L1** |  |  |
| TPS ≥1 | 14 (25.9%) | 13 (27.1%) |
| TPS <1 | 40 (74.1%) | 35 (72.9%) |
| Unknown | 5 | 5 |
|  |  |  |

GEJ: gastro-esophageal junction; LDH: lactate dehydrogenase; NLR: neutrophil to lymphocyte ratio; SD: standard deviation; CPS: combined positive score; TPS: tumor positive score

1 Lauren classification
