# Supplementary material for: Circulating tumor DNA strongly predicts efficacy of chemotherapy plus immune checkpoint inhibitors in patients with advanced gastro-esophageal adenocarcinoma
Source: Research Square preprint supplement (doi:10.21203/rs.3.rs-4739358/v1), 2024-09-18
Supplement: Supplementary file 6 [file df8435c5462414cabfccf19e.docx]

**Supp Table 2. Association between ctDNA level and patient and tumor characteristics.**

|  | ctDNA concentration ng/mL at baseline | | cfDNA concentration ng/mL at baseline | | ∆ctDNA | | ∆cfDNA | |
| --- | --- | --- | --- | --- | --- | --- | --- | --- |
| Variables | N = 701 | p-value2 | N = 703 | p-value2 | N = 704 | p-value2 | N = 705 | p-value6 |
| **Sex** |  | 0.005 |  | 0.2 |  | 0.5 |  | 0.11 |
| Female | 0.01 (0.00, 0.21) |  | 3.28 (1.60, 4.43) |  | -0.72 (-1.00, -0.33) |  | 0.10 (-0.12, 0.87) |  |
| Male | 0.24 (0.03, 1.32) |  | 3.44 (2.37, 6.67) |  | -0.75 (-0.96, 0.62) |  | -0.17 (-0.43, 0.21) |  |
| **ECOG PS** |  | 0.8 |  | 0.7 |  | 0.042 |  | >0.9 |
| 0 | 0.14 (0.01, 0.84) |  | 3.40 (1.76, 4.28) |  | -0.95 (-1.00, -0.63) |  | -0.06 (-0.44, 0.61) |  |
| 1 | 0.16 (0.01, 0.60) |  | 3.45 (1.92, 6.32) |  | -0.52 (-0.92, 1.00) |  | -0.10 (-0.34, 0.40) |  |
| **Primary tumor site** |  | 0.4 |  | 0.2 |  | 0.4 |  | 0.7 |
| GEJ | 0.18 (0.01, 0.75) |  | 3.04 (1.74, 4.83) |  | -0.85 (-0.97, -0.11) |  | -0.12 (-0.42, 0.40) |  |
| Stomach | 0.05 (0.01, 0.70) |  | 4.12 (2.62, 5.88) |  | -0.45 (-0.97, 0.81) |  | -0.03 (-0.31, 0.67) |  |
| **Tumor subtype** |  | 0.3 |  | >0.9 |  | >0.9 |  | 0.7 |
| Diffuse | 0.16 (0.01, 0.63) |  | 3.38 (1.87, 5.66) |  | -0.79 (-0.98, 0.62) |  | -0.13 (-0.43, 0.16) |  |
| Intestinal | 0.05 (0.01, 0.72) |  | 3.44 (2.26, 5.36) |  | -0.68 (-0.97, 0.47) |  | -0.04 (-0.29, 0.83) |  |
| Other | 0.34 (0.18, 1.50) |  | 3.41 (2.29, 3.62) |  | -0.74 (-0.82, -0.45) |  | -0.09 (-0.22, 0.17) |  |
| **Resection of primary tumor** |  | 0.2 |  | 0.13 |  | 0.13 |  | 0.3 |
| No | 0.19 (0.02, 0.77) |  | 3.49 (2.23, 6.32) |  | -0.68 (-0.95, 1.43) |  | -0.11 (-0.44, 0.20) |  |
| Yes | 0.03 (0.01, 0.58) |  | 2.72 (1.46, 4.39) |  | -0.83 (-1.00, -0.29) |  | 0.02 (-0.29, 0.59) |  |
| **Liver metastasis** |  | 0.021 |  | 0.7 |  | 0.4 |  | >0.9 |
| No | 0.05 (0.00, 0.46) |  | 3.38 (1.96, 4.61) |  | -0.83 (-1.00, 0.68) |  | -0.09 (-0.35, 0.36) |  |
| Yes | 0.32 (0.05, 1.16) |  | 3.49 (1.76, 6.84) |  | -0.61 (-0.94, 0.27) |  | -0.10 (-0.44, 0.89) |  |
| **Time to metastatic disease** |  | 0.032 |  | 0.13 |  | 0.2 |  | 0.7 |
| Metachronous | 0.04 (0.01, 0.32) |  | 2.99 (1.49, 4.46) |  | -0.79 (-1.00, -0.29) |  | -0.15 (-0.35, 0.82) |  |
| Synchronous | 0.22 (0.02, 1.11) |  | 3.50 (2.10, 6.11) |  | -0.66 (-0.95, 1.05) |  | -0.06 (-0.44, 0.37) |  |
| **HER2 status** |  | 0.4 |  | 0.2 |  | 0.028 |  | 0.8 |
| Negative | 0.07 (0.01, 0.72) |  | 3.50 (2.17, 5.68) |  | -0.45 (-0.95, 1.10) |  | -0.10 (-0.34, 0.45) |  |
| Positive | 0.21 (0.06, 0.47) |  | 2.73 (1.73, 4.51) |  | -0.93 (-0.99, -0.77) |  | -0.03 (-0.44, 0.48) |  |
| **LDH plasma level** |  | 0.2 |  | 0.7 |  | 0.4 |  | 0.8 |
| >1N | 0.09 (0.02, 1.76) |  | 3.41 (1.75, 11.00) |  | -0.90 (-0.99, 0.04) |  | -0.12 (-0.34, 0.24) |  |
| ≤1N | 0.16 (0.01, 0.54) |  | 3.34 (2.17, 4.62) |  | -0.68 (-0.97, 0.90) |  | -0.09 (-0.38, 0.73) |  |
| Unknown | 6 |  | 6 |  | 6 |  | 6 |  |
| **ALP plasma level** |  | 0.15 |  | 0.2 |  | 0.9 |  | >0.9 |
| >1N | 0.19 (0.02, 1.47) |  | 4.01 (1.83, 8.42) |  | -0.68 (-0.93, 0.53) |  | -0.10 (-0.41, 0.57) |  |
| ≤1N | 0.08 (0.01, 0.44) |  | 3.11 (1.92, 4.45) |  | -0.76 (-0.98, 0.05) |  | -0.10 (-0.35, 0.40) |  |
| Unknown | 1 |  | 1 |  | 1 |  | 1 |  |
| **NLR** |  | 0.6 |  | 0.4 |  | >0.9 |  | 0.13 |
| high | 0.17 (0.01, 0.63) |  | 3.26 (1.77, 5.08) |  | -0.79 (-0.98, 0.90) |  | -0.03 (-0.35, 0.90) |  |
| low | 0.16 (0.02, 0.79) |  | 4.19 (2.43, 5.68) |  | -0.66 (-0.94, -0.15) |  | -0.18 (-0.41, 0.17) |  |
| Unknown | 1 |  | 1 |  | 1 |  | 1 |  |
| **Best response** |  | 0.4 |  | 0.087 |  | 0.067 |  | 0.6 |
| CR | 0.31 (0.01, 0.75) |  | 1.79 (1.70, 4.31) |  | -0.99 (-1.00, -0.92) |  | 0.16 (-0.29, 0.83) |  |
| PR | 0.17 (0.01, 0.47) |  | 2.78 (1.73, 3.66) |  | -0.87 (-0.97, -0.76) |  | -0.12 (-0.36, 0.09) |  |
| SD | 0.04 (0.00, 0.42) |  | 3.30 (1.79, 5.48) |  | -0.63 (-0.99, -0.29) |  | -0.16 (-0.44, 0.41) |  |
| PD | 0.29 (0.04, 1.25) |  | 4.10 (3.31, 7.22) |  | 0.71 (-0.81, 1.47) |  | 0.07 (-0.30, 1.58) |  |
| **Disease control** |  | 0.13 |  | 0.022 |  | 0.013 |  | 0.3 |
| Disease control | 0.07 (0.01, 0.49) |  | 3.01 (1.71, 4.61) |  | -0.87 (-0.99, -0.56) |  | -0.12 (-0.41, 0.21) |  |
| Progression | 0.29 (0.04, 1.25) |  | 4.10 (3.31, 7.22) |  | 0.71 (-0.81, 1.47) |  | 0.07 (-0.30, 1.58) |  |
| GEJ: gastro-esophageal junction; LDH: lactate dehydrogenase; ALP: alkaline phosphatase; NLR: neutrophil to lymphocyte ratio; SD: standard deviation; CPS: combined positive score; TPS: tumor positive score1concentration ctDNA baseline: Median (IQR) | | | | | | | | |
| 2Wilcoxon rank sum test; Kruskal-Wallis rank sum test | | | | | | | | |
| 3cfDNA concentration at baseline: Median (IQR) | | | | | | | | |
| 4ctDNA concentration variation: Median (IQR) | | | | | | | | |
| 5cfDNA concentration variation: Median (IQR) | | | | | | | | |
| 6Wilcoxon rank sum exact test; Kruskal-Wallis rank sum test | | | | | | | | |
